# Supplementary material
Source: publisher figshare collection journal article supplement (https://acs.figshare.com/ndownloader/files/25912443)
Supplement: Supplementary file 1 [file 25912443]

## Sheet: Sheet1
Table S4.
Binding free energies of small biomolecules to nanomaterials.
Material	Adsorbate	DG ads	DG_lower	DG_upper
CNT, pristine	ALA	-0.0779565	-1.2066	1.02115
CNT, pristine	ARG	-11.1611	-13.2675	-8.94797
CNT, pristine	ASN	-5.0866	-6.69597	-3.3921
CNT, pristine	ASP	-0.203879	-1.88633	1.4552
CNT, pristine	CHL	-1.00545	-2.06733	0.0483091
CNT, pristine	CYM	-0.0523801	-2.07324	2.01495
CNT, pristine	CYS	-1.54066	-2.89199	-0.16767
CNT, pristine	DGL	-9.97597	-12.6803	-7.47737
CNT, pristine	EST	-6.87758	-8.55379	-5.12349
CNT, pristine	ETA	1.15231	0.203744	2.18422
CNT, pristine	GAN	-8.64712	-10.6804	-6.53868
CNT, pristine	GLN	-5.63535	-7.68715	-3.62497
CNT, pristine	GLU	-2.25713	-3.70952	-0.665924
CNT, pristine	GLY	-5.38979	-7.0399	-3.81263
CNT, pristine	HID	-9.04398	-11.4866	-6.84024
CNT, pristine	HIE	-9.63513	-11.503	-7.73413
CNT, pristine	HIP	-10.8532	-12.7819	-9.03339
CNT, pristine	ILE	-5.17674	-6.76394	-3.60099
CNT, pristine	LEU	-4.3856	-6.2649	-2.52634
CNT, pristine	LYS	-3.64364	-5.99268	-1.31621
CNT, pristine	MET	-5.59873	-7.08765	-4.01163
CNT, pristine	PHE	-8.8766	-10.8866	-6.89207
CNT, pristine	PHO	-3.85528	-6.05375	-1.59401
CNT, pristine	PRO	-10.1185	-12.5808	-7.61962
CNT, pristine	SER	-1.09952	-2.21897	0.00578348
CNT, pristine	THR	-2.55783	-3.77754	-1.29192
CNT, pristine	TRP	-13.5067	-16.8489	-10.2296
CNT, pristine	TYR	-13.3452	-15.8621	-10.641
CNT, pristine	VAL	-3.94147	-5.24303	-2.47808
CNT-COO-(high)	ALA	2.07447	0.637997	3.46681
CNT-COO-(high)	ARG	-12.6566	-16.3993	-8.88849
CNT-COO-(high)	ASN	-3.11618	-4.72748	-1.44184
CNT-COO-(high)	ASP	1.31798	-1.02131	3.44462
CNT-COO-(high)	CHL	-0.213443	-1.9438	1.48845
CNT-COO-(high)	CYM	-0.410474	-3.48599	2.81453
CNT-COO-(high)	CYS	1.18402	-0.069474	2.51763
CNT-COO-(high)	DGL	-21.2228	-32.8808	-10.0719
CNT-COO-(high)	EST	-4.37514	-7.39908	-1.52845
CNT-COO-(high)	ETA	-9.38918	-13.3024	-5.58303
CNT-COO-(high)	GAN	-8.93877	-12.536	-5.16602
CNT-COO-(high)	GLN	-4.29926	-6.51778	-2.07019
CNT-COO-(high)	GLU	0.549529	-1.97856	3.12833
CNT-COO-(high)	GLY	-8.72295	-14.1404	-3.15902
CNT-COO-(high)	HID	-6.20962	-9.01073	-3.64465
CNT-COO-(high)	HIE	-7.69322	-10.8759	-4.32216
CNT-COO-(high)	HIP	-14.1237	-19.5495	-8.62233
CNT-COO-(high)	ILE	-0.735401	-2.88236	1.6808
CNT-COO-(high)	LEU	-3.06843	-5.11431	-0.941651
CNT-COO-(high)	LYS	-9.76111	-18.1329	-2.37782
CNT-COO-(high)	MET	-1.78272	-4.51881	0.667668
CNT-COO-(high)	PHE	-6.75835	-9.8348	-3.8767
CNT-COO-(high)	PHO	-2.69792	-7.12632	1.58991
CNT-COO-(high)	PRO	-5.57279	-9.54334	-1.65238
CNT-COO-(high)	SER	0.71684	-1.05552	2.44264
CNT-COO-(high)	THR	-0.264592	-2.20935	1.69072
CNT-COO-(high)	TRP	-10.627	-13.8686	-6.70853
CNT-COO-(high)	TYR	-11.5231	-16.1584	-6.99227
CNT-COO-(high)	VAL	0.584062	-1.25407	2.26146
CNT-COO-(low)	ALA	0.90316	-0.115492	1.91511
CNT-COO-(low)	ARG	-10.5989	-13.7161	-7.70145
CNT-COO-(low)	ASN	-4.35144	-6.09445	-2.41104
CNT-COO-(low)	ASP	-0.169897	-1.7523	1.35749
CNT-COO-(low)	CHL	-0.330111	-1.71093	1.16568
CNT-COO-(low)	CYM	1.51043	-0.0623417	3.04022
CNT-COO-(low)	CYS	-0.867801	-2.16455	0.420027
CNT-COO-(low)	DGL	-17.8213	-25.9685	-9.12219
CNT-COO-(low)	EST	-7.13956	-9.36931	-5.05996
CNT-COO-(low)	ETA	-4.44152	-8.13334	-0.622293
CNT-COO-(low)	GAN	-8.12254	-11.4601	-5.0316
CNT-COO-(low)	GLN	-5.75056	-7.94586	-3.5551
CNT-COO-(low)	GLU	-0.772868	-2.72955	1.12869
CNT-COO-(low)	GLY	-7.60221	-11.1261	-3.67649
CNT-COO-(low)	HID	-9.1327	-11.005	-7.24782
CNT-COO-(low)	HIE	-8.00288	-10.0206	-6.09758
CNT-COO-(low)	HIP	-11.6136	-15.3498	-8.14682
CNT-COO-(low)	ILE	-3.51113	-5.21186	-1.67351
CNT-COO-(low)	LEU	-4.37972	-5.95794	-2.94693
CNT-COO-(low)	LYS	-5.87093	-10.8049	-1.08306
CNT-COO-(low)	MET	-5.67972	-7.60752	-3.8012
CNT-COO-(low)	PHE	-8.59628	-11.0342	-6.28261
CNT-COO-(low)	PHO	-3.5062	-6.38315	-0.576392
CNT-COO-(low)	PRO	-9.22312	-14.5099	-4.38087
CNT-COO-(low)	SER	-0.776903	-2.10798	0.576477
CNT-COO-(low)	THR	-2.70843	-4.31563	-1.23444
CNT-COO-(low)	TRP	-13.8638	-16.0862	-11.6202
CNT-COO-(low)	TYR	-14.2175	-17.2356	-11.2707
CNT-COO-(low)	VAL	-2.50205	-3.75084	-1.25495
CNT-COOH(high)	ALA	2.71988	1.58755	3.92575
CNT-COOH(high)	ARG	-3.28003	-5.65406	-1.05631
CNT-COOH(high)	ASN	-0.492553	-3.15235	2.18495
CNT-COOH(high)	ASP	-16.7089	-28.371	-5.15587
CNT-COOH(high)	CHL	-1.11376	-3.08926	0.766771
CNT-COOH(high)	CYM	-6.14879	-13.7153	1.65406
CNT-COOH(high)	CYS	2.44889	-0.192074	5.05287
CNT-COOH(high)	DGL	-3.08868	-7.80695	1.73965
CNT-COOH(high)	EST	-1.25959	-3.2582	0.627814
CNT-COOH(high)	ETA	1.14279	-0.24911	2.57631
CNT-COOH(high)	GAN	-4.28092	-7.30626	-1.16078
CNT-COOH(high)	GLN	-1.71819	-4.66728	1.24944
CNT-COOH(high)	GLU	-41.833	-52.6781	-30.4112
CNT-COOH(high)	GLY	-3.23367	-7.37436	0.857738
CNT-COOH(high)	HID	-1.72104	-4.13913	0.721178
CNT-COOH(high)	HIE	-3.46731	-6.25546	-0.574751
CNT-COOH(high)	HIP	-2.08437	-4.06398	-0.0820435
CNT-COOH(high)	ILE	0.810669	-0.697838	2.49891
CNT-COOH(high)	LEU	1.80995	-0.667703	4.17918
CNT-COOH(high)	LYS	0.326084	-3.09697	3.29308
CNT-COOH(high)	MET	-0.0681913	-1.72736	1.54047
CNT-COOH(high)	PHE	-0.274122	-2.52314	1.86721
CNT-COOH(high)	PHO	-14.817	-23.0923	-6.20346
CNT-COOH(high)	PRO	-5.88036	-9.82282	-2.03662
CNT-COOH(high)	SER	1.66352	0.46958	2.90008
CNT-COOH(high)	THR	0.194637	-1.46843	1.87878
CNT-COOH(high)	TRP	-2.33683	-4.18485	-0.416004
CNT-COOH(high)	TYR	-1.86053	-4.24228	0.138473
CNT-COOH(high)	VAL	0.951609	-0.606413	2.50688
CNT-COOH(low)	ALA	0.0868493	-0.771366	1.01593
CNT-COOH(low)	ARG	-11.1974	-13.6445	-8.68521
CNT-COOH(low)	ASN	-4.26162	-5.94737	-2.6287
CNT-COOH(low)	ASP	-1.12061	-3.97918	1.63159
CNT-COOH(low)	CHL	-0.915263	-1.90264	0.102742
CNT-COOH(low)	CYM	0.336995	-1.35722	2.0249
CNT-COOH(low)	CYS	-1.93597	-2.88274	-0.978544
CNT-COOH(low)	DGL	-10.0837	-13.4708	-6.60885
CNT-COOH(low)	EST	-8.50436	-10.2179	-6.99513
CNT-COOH(low)	ETA	3.30859	0.992528	5.78039
CNT-COOH(low)	GAN	-6.69831	-8.90498	-4.2891
CNT-COOH(low)	GLN	-5.89399	-8.18426	-3.60084
CNT-COOH(low)	GLU	-3.71685	-7.43732	0.418187
CNT-COOH(low)	GLY	-4.94983	-6.75492	-3.11058
CNT-COOH(low)	HID	-9.60614	-11.454	-7.63262
CNT-COOH(low)	HIE	-9.12933	-12.0736	-6.37452
CNT-COOH(low)	HIP	-8.79595	-10.9449	-6.61919
CNT-COOH(low)	ILE	-5.10929	-6.84173	-3.42891
CNT-COOH(low)	LEU	-5.15851	-6.97305	-3.2753
CNT-COOH(low)	LYS	-3.24199	-4.96254	-1.51455
CNT-COOH(low)	MET	-5.58075	-7.30913	-3.9849
CNT-COOH(low)	PHE	-8.85905	-11.4166	-6.49142
CNT-COOH(low)	PHO	-1.59165	-5.23615	1.96915
CNT-COOH(low)	PRO	-8.77305	-11.0877	-6.20592
CNT-COOH(low)	SER	-0.971099	-2.12143	0.233314
CNT-COOH(low)	THR	-2.79026	-4.20649	-1.17084
CNT-COOH(low)	TRP	-15.0377	-18.5425	-12.0866
CNT-COOH(low)	TYR	-14.6892	-17.233	-12.0708
CNT-COOH(low)	VAL	-2.73506	-4.19017	-1.17697
CNT-NH2(high)	ALA	4.5227	2.21677	6.78856
CNT-NH2(high)	ARG	-4.67568	-8.21143	-1.28577
CNT-NH2(high)	ASN	-0.760555	-2.71893	1.2378
CNT-NH2(high)	ASP	-1.86753	-4.12113	0.473387
CNT-NH2(high)	CHL	-2.31434	-4.70988	-0.177813
CNT-NH2(high)	CYM	0.730072	-1.29576	2.9208
CNT-NH2(high)	CYS	3.56857	2.16333	4.98199
CNT-NH2(high)	DGL	-12.1244	-17.2811	-6.90713
CNT-NH2(high)	EST	6.76596	-1.57359	14.5071
CNT-NH2(high)	ETA	-4.4934	-7.47762	-1.56121
CNT-NH2(high)	GAN	-2.91533	-5.79399	-0.0155588
CNT-NH2(high)	GLN	-1.18747	-3.50035	1.1769
CNT-NH2(high)	GLU	-0.0849892	-2.2726	2.1603
CNT-NH2(high)	GLY	-3.01139	-5.60001	-0.31574
CNT-NH2(high)	HID	-2.93991	-5.76419	-0.143493
CNT-NH2(high)	HIE	-3.34312	-5.88624	-1.12736
CNT-NH2(high)	HIP	-5.83335	-9.067	-2.6257
CNT-NH2(high)	ILE	2.17519	0.756814	3.67189
CNT-NH2(high)	LEU	2.44964	0.570292	4.30558
CNT-NH2(high)	LYS	-6.37409	-10.3002	-2.34656
CNT-NH2(high)	MET	1.39098	-0.307549	3.1277
CNT-NH2(high)	PHE	-0.672364	-3.19581	1.91124
CNT-NH2(high)	PHO	-6.51065	-11.0928	-1.73097
CNT-NH2(high)	PRO	-4.79949	-8.97727	-0.898472
CNT-NH2(high)	SER	1.28185	0.305028	2.27542
CNT-NH2(high)	THR	1.00037	-0.432165	2.52697
CNT-NH2(high)	TRP	-2.58262	-6.32796	1.30531
CNT-NH2(high)	TYR	-3.83607	-7.41097	0.00106835
CNT-NH2(high)	VAL	2.76727	1.36088	4.28163
CNT-NH2(low)	ALA	0.414995	-0.505327	1.33783
CNT-NH2(low)	ARG	-10.569	-13.1159	-7.93919
CNT-NH2(low)	ASN	-4.86938	-6.57076	-3.17972
CNT-NH2(low)	ASP	-0.501551	-2.31765	1.04573
CNT-NH2(low)	CHL	-2.33294	-3.89902	-0.732416
CNT-NH2(low)	CYM	0.405935	-0.79513	1.3931
CNT-NH2(low)	CYS	-1.41585	-2.67694	-0.132348
CNT-NH2(low)	DGL	-10.4716	-13.7424	-7.42671
CNT-NH2(low)	EST	-7.44808	-9.34905	-5.39536
CNT-NH2(low)	ETA	0.526757	-0.842563	1.7871
CNT-NH2(low)	GAN	-7.99427	-10.5259	-5.45671
CNT-NH2(low)	GLN	-4.80862	-7.17149	-2.56257
CNT-NH2(low)	GLU	-2.57325	-4.44502	-0.715272
CNT-NH2(low)	GLY	-4.62458	-6.77721	-2.60712
CNT-NH2(low)	HID	-8.78205	-10.7008	-6.83519
CNT-NH2(low)	HIE	-8.78155	-10.7973	-6.80905
CNT-NH2(low)	HIP	-10.9313	-13.2829	-8.57238
CNT-NH2(low)	ILE	-5.0419	-6.48712	-3.5219
CNT-NH2(low)	LEU	-4.55207	-6.26829	-2.76241
CNT-NH2(low)	LYS	-2.95575	-5.15511	-0.520868
CNT-NH2(low)	MET	-5.83927	-7.71971	-4.04578
CNT-NH2(low)	PHE	-8.81684	-10.9477	-6.68562
CNT-NH2(low)	PHO	-2.57867	-4.83399	-0.390366
CNT-NH2(low)	PRO	-9.15349	-12.0916	-6.15869
CNT-NH2(low)	SER	1.33345	-1.23551	3.91701
CNT-NH2(low)	THR	-2.32858	-3.74711	-0.835391
CNT-NH2(low)	TRP	-12.8969	-15.6391	-10.2165
CNT-NH2(low)	TYR	-13.7154	-16.1533	-11.3143
CNT-NH2(low)	VAL	-2.73478	-4.13859	-1.29191
CNT-NH3+(high)	ALA	1.83982	0.591297	3.10662
CNT-NH3+(high)	ARG	-6.86644	-10.1982	-3.53961
CNT-NH3+(high)	ASN	-2.96624	-5.24342	-0.507706
CNT-NH3+(high)	ASP	-27.8054	-40.6913	-13.7453
CNT-NH3+(high)	CHL	2.65949	1.35392	4.06316
CNT-NH3+(high)	CYM	-10.1945	-20.4618	-1.61094
CNT-NH3+(high)	CYS	-0.436869	-2.33082	1.38468
CNT-NH3+(high)	DGL	-9.21813	-14.0643	-4.38571
CNT-NH3+(high)	EST	-6.66697	-9.66743	-3.64438
CNT-NH3+(high)	ETA	4.14108	3.00748	5.25421
CNT-NH3+(high)	GAN	-6.13835	-8.71624	-3.32996
CNT-NH3+(high)	GLN	-4.66363	-7.03349	-2.02576
CNT-NH3+(high)	GLU	-30.0091	-40.7239	-20.1011
CNT-NH3+(high)	GLY	-4.96996	-7.3498	-2.39291
CNT-NH3+(high)	HID	-7.00058	-9.53172	-4.66997
CNT-NH3+(high)	HIE	-7.65669	-10.3185	-5.18029
CNT-NH3+(high)	HIP	-6.16115	-9.2598	-2.99354
CNT-NH3+(high)	ILE	0.138266	-4.5439	4.58859
CNT-NH3+(high)	LEU	-3.46402	-5.65023	-1.09808
CNT-NH3+(high)	LYS	1.25404	-1.03652	3.48486
CNT-NH3+(high)	MET	-4.47384	-6.91354	-2.18905
CNT-NH3+(high)	PHE	-7.91596	-10.8418	-4.74766
CNT-NH3+(high)	PHO	-23.0516	-35.5403	-11.7361
CNT-NH3+(high)	PRO	-8.19467	-11.5949	-4.83337
CNT-NH3+(high)	SER	0.268539	-1.29543	1.85894
CNT-NH3+(high)	THR	-1.44044	-3.20238	0.411557
CNT-NH3+(high)	TRP	-10.8965	-14.0284	-7.47632
CNT-NH3+(high)	TYR	-11.4665	-15.456	-7.47942
CNT-NH3+(high)	VAL	-1.12252	-2.88192	0.498636
CNT-NH3+(low)	ALA	1.15402	0.0126856	2.3183
CNT-NH3+(low)	ARG	-9.46896	-12.5122	-6.26867
CNT-NH3+(low)	ASN	-3.94292	-5.94384	-1.82116
CNT-NH3+(low)	ASP	-21.8916	-31.8259	-11.8318
CNT-NH3+(low)	CHL	0.530023	-0.561652	1.80265
CNT-NH3+(low)	CYM	-20.1061	-26.3424	-13.4519
CNT-NH3+(low)	CYS	-1.3658	-2.72362	-0.0289184
CNT-NH3+(low)	DGL	-10.569	-13.9717	-7.46616
CNT-NH3+(low)	EST	-7.27928	-9.51537	-5.20488
CNT-NH3+(low)	ETA	2.39045	1.36244	3.40873
CNT-NH3+(low)	GAN	-1.37096	-7.88524	5.06773
CNT-NH3+(low)	GLN	-4.98562	-7.14817	-2.81994
CNT-NH3+(low)	GLU	-26.1451	-36.0655	-15.5974
CNT-NH3+(low)	GLY	-4.48947	-6.57236	-2.30192
CNT-NH3+(low)	HID	-7.7039	-9.94567	-5.47636
CNT-NH3+(low)	HIE	-8.58758	-11.273	-6.00874
CNT-NH3+(low)	HIP	-7.00797	-8.71628	-5.26743
CNT-NH3+(low)	ILE	-0.214233	-5.64691	4.6722
CNT-NH3+(low)	LEU	-4.1805	-5.72463	-2.56209
CNT-NH3+(low)	LYS	-1.89057	-3.76783	0.131002
CNT-NH3+(low)	MET	-5.29006	-6.85585	-3.6768
CNT-NH3+(low)	PHE	-9.13682	-11.7196	-6.24944
CNT-NH3+(low)	PHO	-39.2473	-55.3556	-22.924
CNT-NH3+(low)	PRO	-10.2713	-12.5357	-7.86601
CNT-NH3+(low)	SER	-0.570863	-1.59351	0.401153
CNT-NH3+(low)	THR	-1.72463	-3.12246	-0.262091
CNT-NH3+(low)	TRP	-12.1161	-15.0499	-9.57605
CNT-NH3+(low)	TYR	-14.3403	-17.4823	-11.0951
CNT-NH3+(low)	VAL	-2.75427	-4.22522	-1.24033
CNT-OH(high)	ALA	3.00168	1.33606	4.50478
CNT-OH(high)	ARG	-9.10664	-12.3918	-5.71391
CNT-OH(high)	ASN	-2.08267	-4.51186	0.281056
CNT-OH(high)	ASP	-25.693	-35.2653	-16.0035
CNT-OH(high)	CHL	-6.57291	-8.53404	-4.5412
CNT-OH(high)	CYM	-9.59542	-17.3206	-2.20792
CNT-OH(high)	CYS	0.197113	-1.21122	1.76314
CNT-OH(high)	DGL	-7.10905	-10.9961	-2.9702
CNT-OH(high)	EST	-1.57006	-3.44948	0.162198
CNT-OH(high)	ETA	-1.79619	-3.40376	-0.21048
CNT-OH(high)	GAN	2.19249	-2.52392	7.3531
CNT-OH(high)	GLN	-4.04598	-6.82564	-1.34018
CNT-OH(high)	GLU	-14.8008	-26.614	-3.26869
CNT-OH(high)	GLY	2.4576	-3.9565	8.90391
CNT-OH(high)	HID	-2.97414	-5.51136	-0.556375
CNT-OH(high)	HIE	-3.57083	-6.97462	-0.43852
CNT-OH(high)	HIP	-8.13111	-10.9847	-5.28792
CNT-OH(high)	ILE	0.67863	-0.973482	2.33063
CNT-OH(high)	LEU	-0.252842	-2.30117	1.51871
CNT-OH(high)	LYS	-4.16221	-7.06311	-1.47545
CNT-OH(high)	MET	-1.56239	-3.73263	0.423014
CNT-OH(high)	PHE	-2.13625	-3.99781	-0.304047
CNT-OH(high)	PHO	-7.36189	-13.8528	-1.4488
CNT-OH(high)	PRO	-7.0926	-10.5303	-4.01111
CNT-OH(high)	SER	0.190018	-0.977543	1.41396
CNT-OH(high)	THR	0.0542912	-1.52364	1.47232
CNT-OH(high)	TRP	-4.33975	-6.54925	-2.01963
CNT-OH(high)	TYR	-2.79613	-4.98315	-0.588214
CNT-OH(high)	VAL	1.01882	-0.846867	2.9453
CNT-OH(low)	ALA	0.0460712	-0.737749	0.885782
CNT-OH(low)	ARG	-12.7245	-15.2614	-10.3885
CNT-OH(low)	ASN	-4.1744	-5.76036	-2.5776
CNT-OH(low)	ASP	-9.95415	-20.8667	0.317738
CNT-OH(low)	CHL	-2.84052	-4.58541	-1.25903
CNT-OH(low)	CYM	-12.8388	-20.3831	-5.301
CNT-OH(low)	CYS	-1.45672	-2.78504	-0.0481724
CNT-OH(low)	DGL	-9.81546	-13.065	-6.49841
CNT-OH(low)	EST	-5.86316	-7.67932	-3.77295
CNT-OH(low)	ETA	0.876978	-0.294017	2.17551
CNT-OH(low)	GAN	-7.24583	-9.54558	-4.97687
CNT-OH(low)	GLN	-6.68646	-9.71742	-3.46543
CNT-OH(low)	GLU	-16.2262	-27.9917	-4.79966
CNT-OH(low)	GLY	-4.56803	-6.04083	-2.94704
CNT-OH(low)	HID	-9.62271	-12.1587	-7.15574
CNT-OH(low)	HIE	-9.95808	-12.002	-7.70104
CNT-OH(low)	HIP	-11.3574	-13.8491	-8.74839
CNT-OH(low)	ILE	-5.62587	-7.56018	-3.86089
CNT-OH(low)	LEU	-4.76718	-6.09211	-3.35893
CNT-OH(low)	LYS	-4.18249	-6.22889	-2.12797
CNT-OH(low)	MET	-6.24424	-8.18259	-4.23012
CNT-OH(low)	PHE	-8.16015	-10.4186	-5.8467
CNT-OH(low)	PHO	-2.87605	-6.33773	0.601621
CNT-OH(low)	PRO	-9.48189	-11.5147	-7.42863
CNT-OH(low)	SER	-0.765908	-1.96939	0.342034
CNT-OH(low)	THR	-2.71601	-4.18453	-1.29604
CNT-OH(low)	TRP	-13.1938	-15.9443	-10.5639
CNT-OH(low)	TYR	-12.518	-15.5661	-9.701
CNT-OH(low)	VAL	-2.96547	-4.53683	-1.33789
Graphene	ALA	-1.2332	-1.3535	-1.1163
Graphene	ARG	-17.2001	-17.5874	-16.813
Graphene	ASN	-7.214	-7.3686	-7.0606
Graphene	ASP	-2.3209	-2.4168	-2.226
Graphene	CHL	-2.2409	-2.3906	-2.0945
Graphene	CYM	-1.5335	-1.6247	-1.4436
Graphene	CYS	-3.5106	-3.6512	-3.3715
Graphene	DGL	-16.0881	-16.3818	-15.8017
Graphene	EST	-11.214	-11.4881	-10.9433
Graphene	ETA	-0.2558	-0.3089	-0.2045
Graphene	GAN	-10.9962	-11.3657	-10.6336
Graphene	GLN	-8.4681	-8.569	-8.368
Graphene	GLU	-3.9648	-4.1762	-3.7563
Graphene	GLY	-8.5579	-8.6685	-8.4485
Graphene	HID	-13.6656	-13.8288	-13.5047
Graphene	HIE	-13.9517	-14.3233	-13.5828
Graphene	HIP	-14.3685	-14.7258	-14.013
Graphene	ILE	-8.5979	-8.7924	-8.4054
Graphene	LEU	-7.1382	-7.2549	-7.0228
Graphene	LYS	-5.9134	-6.2502	-5.5836
Graphene	MET	-9.1365	-9.2732	-9.0002
Graphene	PHE	-15.6397	-15.7851	-15.4956
Graphene	PHO	-5.5787	-5.7735	-5.3851
Graphene	PRO	-14.0407	-14.3065	-13.7821
Graphene	SER	-2.7224	-2.8078	-2.6386
Graphene	THR	-4.3753	-4.5347	-4.2173
Graphene	TRP	-24.2858	-24.7674	-23.8063
Graphene	TYR	-21.3811	-21.6578	-21.1055
Graphene	VAL	-5.5555	-5.7226	-5.3891
Bilayer-graphene	ALA	-1.2432	-1.3613	-1.1285
Bilayer-graphene	ARG	-17.6261	-18.1338	-17.1205
Bilayer-graphene	ASN	-8.0366	-8.3115	-7.7649
Bilayer-graphene	ASP	-2.8117	-2.9148	-2.7097
Bilayer-graphene	CHL	-2.5815	-2.6859	-2.4795
Bilayer-graphene	CYM	-1.7046	-1.8381	-1.5733
Bilayer-graphene	CYS	-3.5091	-3.6422	-3.3776
Bilayer-graphene	DGL	-17.5142	-17.9114	-17.1183
Bilayer-graphene	EST	-12.444	-12.6648	-12.2239
Bilayer-graphene	ETA	-0.3794	-0.4692	-0.2915
Bilayer-graphene	GAN	-11.4736	-11.8552	-11.1017
Bilayer-graphene	GLN	-9.3972	-9.5788	-9.2172
Bilayer-graphene	GLU	-5.1791	-5.4542	-4.9054
Bilayer-graphene	GLY	-9.5662	-9.6821	-9.4506
Bilayer-graphene	HID	-14.3352	-14.5779	-14.0945
Bilayer-graphene	HIE	-14.7506	-15.0974	-14.4067
Bilayer-graphene	HIP	-15.3778	-15.7014	-15.0545
Bilayer-graphene	ILE	-8.8302	-8.9479	-8.714
Bilayer-graphene	LEU	-7.2337	-7.353	-7.1155
Bilayer-graphene	LYS	-6.5346	-6.7282	-6.3434
Bilayer-graphene	MET	-9.4855	-9.6479	-9.3243
Bilayer-graphene	PHE	-15.8162	-16.096	-15.5383
Bilayer-graphene	PHO	-6.4433	-6.738	-6.152
Bilayer-graphene	PRO	-15.1716	-15.3911	-14.9562
Bilayer-graphene	SER	-2.7089	-2.8212	-2.5988
Bilayer-graphene	THR	-4.6378	-4.7669	-4.5104
Bilayer-graphene	TRP	-24.721	-25.0679	-24.3761
Bilayer-graphene	TYR	-21.9519	-22.4248	-21.4803
Bilayer-graphene	VAL	-5.5198	-5.6568	-5.3838
Threelayer-graphene	ALA	-1.1618	-1.2965	-1.0314
Threelayer-graphene	ARG	-18.1888	-18.5224	-17.8566
Threelayer-graphene	ASN	-8.2521	-8.5027	-8.0052
Threelayer-graphene	ASP	-2.6497	-2.7676	-2.5329
Threelayer-graphene	CHL	-2.4368	-2.7081	-2.1732
Threelayer-graphene	CYM	-1.4475	-1.5982	-1.3027
Threelayer-graphene	CYS	-3.7811	-3.9795	-3.5855
Threelayer-graphene	DGL	-19.2285	-19.8041	-18.6779
Threelayer-graphene	EST	-12.4397	-12.6362	-12.2453
Threelayer-graphene	ETA	-0.3093	-0.3909	-0.2299
Threelayer-graphene	GAN	-12.4025	-12.7354	-12.0726
Threelayer-graphene	GLN	-9.9611	-10.1065	-9.8164
Threelayer-graphene	GLU	-4.5864	-4.7304	-4.4441
Threelayer-graphene	GLY	-9.7277	-9.9524	-9.505
Threelayer-graphene	HID	-15.0167	-15.2492	-14.7866
Threelayer-graphene	HIE	-15.1566	-15.3853	-14.9288
Threelayer-graphene	HIP	-15.5885	-15.9998	-15.1793
Threelayer-graphene	ILE	-8.6619	-8.8872	-8.4394
Threelayer-graphene	LEU	-7.1682	-7.371	-6.9675
Threelayer-graphene	LYS	-6.0758	-6.2834	-5.87
Threelayer-graphene	MET	-9.633	-9.7924	-9.4741
Threelayer-graphene	PHE	-15.6553	-15.9255	-15.3861
Threelayer-graphene	PHO	-7.4732	-7.6866	-7.2638
Threelayer-graphene	PRO	-15.8209	-16.0684	-15.5737
Threelayer-graphene	SER	-2.7562	-2.9597	-2.5582
Threelayer-graphene	THR	-4.8685	-5.0423	-4.6962
Threelayer-graphene	TRP	-24.2406	-24.9385	-23.5443
Threelayer-graphene	TYR	-22.9955	-23.2817	-22.7103
Threelayer-graphene	VAL	-5.4056	-5.5637	-5.251
Graphene oxide	ALA	0.0852	0.0286	0.1405
Graphene oxide	ARG	-8.4296	-8.7778	-8.0837
Graphene oxide	ASN	-3.216	-3.4109	-3.0282
Graphene oxide	ASP	-4.9779	-6.8215	-3.4352
Graphene oxide	CHL	-5.8829	-6.2747	-5.5045
Graphene oxide	CYM	-0.2783	-0.44	-0.1249
Graphene oxide	CYS	-1.0743	-1.1774	-0.9734
Graphene oxide	DGL	-10.2119	-10.6263	-9.8008
Graphene oxide	EST	-2.9516	-3.1273	-2.7818
Graphene oxide	ETA	-2.6831	-2.8445	-2.5251
Graphene oxide	GAN	-4.0497	-4.3468	-3.7596
Graphene oxide	GLN	-3.6324	-3.7525	-3.5136
Graphene oxide	GLU	-10.6754	-10.8942	-10.5324
Graphene oxide	GLY	-5.0056	-5.2361	-4.7798
Graphene oxide	HID	-4.8624	-5.2133	-4.5369
Graphene oxide	HIE	-4.202	-4.41	-4.0007
Graphene oxide	HIP	-6.6111	-6.9942	-6.242
Graphene oxide	ILE	-1.3361	-1.4591	-1.2169
Graphene oxide	LEU	-1.3659	-1.436	-1.2969
Graphene oxide	LYS	-4.1915	-4.372	-4.0138
Graphene oxide	MET	-2.0034	-2.1414	-1.8691
Graphene oxide	PHE	-2.5109	-2.6876	-2.3392
Graphene oxide	PHO	-3.2285	-3.5402	-2.9301
Graphene oxide	PRO	-7.939	-8.2403	-7.6447
Graphene oxide	SER	-0.716	-0.7758	-0.6573
Graphene oxide	THR	-1.4964	-1.6819	-1.3161
Graphene oxide	TRP	-4.8351	-5.0728	-4.6042
Graphene oxide	TYR	-4.7545	-4.9311	-4.5792
Graphene oxide	VAL	-0.9619	-1.0355	-0.8893
Red. graphene oxide	ALA	-2.455	-2.5853	-2.3264
Red. graphene oxide	ARG	-15.3512	-15.4987	-15.2045
Red. graphene oxide	ASN	-8.1795	-8.4299	-7.9348
Red. graphene oxide	ASP	-2.4219	-2.4219	-2.4219
Red. graphene oxide	CHL	-2.4397	-2.5903	-2.2931
Red. graphene oxide	CYM	-1.4744	-1.6398	-1.3131
Red. graphene oxide	CYS	-4.9094	-5.0228	-4.7972
Red. graphene oxide	DGL	-17.309	-17.7398	-16.8802
Red. graphene oxide	EST	-13.6728	-14.0855	-13.264
Red. graphene oxide	ETA	-0.3448	-0.4731	-0.2193
Red. graphene oxide	GAN	-11.4808	-11.6551	-11.3084
Red. graphene oxide	GLN	-9.9268	-9.9268	-9.9268
Red. graphene oxide	GLU	-4.9455	-5.2547	-4.6435
Red. graphene oxide	GLY	-8.5212	-8.7028	-8.3407
Red. graphene oxide	HID	-15.1129	-15.5528	-14.6762
Red. graphene oxide	HIE	-14.6735	-15.1005	-14.2495
Red. graphene oxide	HIP	-14.2356	-14.4368	-14.0367
Red. graphene oxide	ILE	-11.2876	-11.4278	-11.1484
Red. graphene oxide	LEU	-10.9581	-11.2287	-10.6885
Red. graphene oxide	LYS	-7.7008	-7.9073	-7.4957
Red. graphene oxide	MET	-11.9479	-12.2516	-11.6469
Red. graphene oxide	PHE	-17.9045	-18.2052	-17.6046
Red. graphene oxide	PHO	-7.6584	-7.8679	-7.4508
Red. graphene oxide	PRO	-15.566	-16.058	-15.0929
Red. graphene oxide	SER	-3.492	-3.6355	-3.351
Red. graphene oxide	THR	-5.9791	-6.1483	-5.8121
Red. graphene oxide	TRP	-25.751	-26.6239	-24.8874
Red. graphene oxide	TYR	-22.7404	-23.1805	-22.3124
Red. graphene oxide	VAL	-8.4581	-8.6323	-8.2888
C_amorph-1	ALA	-1.4639	-1.5465	-1.3828
C_amorph-1	ARG	-20.8026	-21.0762	-20.5296
C_amorph-1	ASN	-10.4045	-10.6715	-10.1408
C_amorph-1	ASP	-3.7567	-3.9654	-3.5511
C_amorph-1	CHL	-4.0892	-4.2397	-3.9404
C_amorph-1	CYM	-2.4447	-2.5887	-2.3023
C_amorph-1	CYS	-5.3458	-5.545	-5.1491
C_amorph-1	DGL	-24.0535	-24.7311	-23.3916
C_amorph-1	EST	-16.3638	-16.5907	-16.139
C_amorph-1	ETA	-0.6206	-0.6985	-0.5437
C_amorph-1	GAN	-15.5531	-15.8106	-15.2959
C_amorph-1	GLN	-12.8321	-13.1089	-12.559
C_amorph-1	GLU	-7.0561	-7.2954	-6.8177
C_amorph-1	GLY	-12.507	-12.8019	-12.2132
C_amorph-1	HID	-18.8264	-19.0618	-18.5916
C_amorph-1	HIE	-18.9292	-19.3122	-18.5476
C_amorph-1	HIP	-17.2905	-17.6693	-16.9152
C_amorph-1	ILE	-13.7015	-14.02	-13.3866
C_amorph-1	LEU	-12.4616	-12.7842	-12.1438
C_amorph-1	LYS	-10.1214	-10.3068	-9.9403
C_amorph-1	MET	-14.4294	-14.6978	-14.1618
C_amorph-1	PHE	-22.8437	-23.256	-22.4325
C_amorph-1	PHO	-11.7674	-12.1302	-11.4068
C_amorph-1	PRO	-21.9026	-22.1496	-21.6568
C_amorph-1	SER	-3.5706	-3.724	-3.4194
C_amorph-1	THR	-7.3444	-7.5795	-7.111
C_amorph-1	TRP	-32.7442	-33.5836	-31.9079
C_amorph-1	TYR	-28.2839	-28.818	-27.7509
C_amorph-1	VAL	-9.6685	-9.9909	-9.349
C_amorph-2	ALA	-1.7819	-1.8806	-1.6856
C_amorph-2	ARG	-22.6869	-23.041	-22.3338
C_amorph-2	ASN	-10.9267	-11.1052	-10.7491
C_amorph-2	ASP	-4.4558	-4.5483	-4.364
C_amorph-2	CHL	-4.356	-4.4862	-4.2272
C_amorph-2	CYM	-2.3618	-2.5102	-2.2167
C_amorph-2	CYS	-6.2849	-6.5222	-6.0521
C_amorph-2	DGL	-25.328	-25.8225	-24.8343
C_amorph-2	EST	-16.9588	-17.3633	-16.5596
C_amorph-2	ETA	-0.3969	-0.4684	-0.3278
C_amorph-2	GAN	-15.91	-16.5303	-15.2993
C_amorph-2	GLN	-14.222	-14.9297	-13.526
C_amorph-2	GLU	-8.4837	-8.7276	-8.2411
C_amorph-2	GLY	-13.0642	-13.4361	-12.7023
C_amorph-2	HID	-19.4286	-19.9203	-18.9381
C_amorph-2	HIE	-19.4483	-19.872	-19.026
C_amorph-2	HIP	-17.9297	-18.4262	-17.4347
C_amorph-2	ILE	-14.0837	-14.3931	-13.7799
C_amorph-2	LEU	-14.5814	-14.8667	-14.2969
C_amorph-2	LYS	-10.3614	-10.717	-10.0088
C_amorph-2	MET	-14.6837	-15.0492	-14.3197
C_amorph-2	PHE	-22.0922	-22.5162	-21.6689
C_amorph-2	PHO	-12.0284	-12.6803	-11.3828
C_amorph-2	PRO	-23.2462	-23.8172	-22.6878
C_amorph-2	SER	-4.2684	-4.4018	-4.1364
C_amorph-2	THR	-7.4105	-7.6211	-7.2037
C_amorph-2	TRP	-33.5279	-34.4243	-32.6333
C_amorph-2	TYR	-28.3743	-29.1554	-27.5959
C_amorph-2	VAL	-10.2657	-10.4214	-10.1108
C_amorph-3	ALA	-2.2227	-2.4057	-2.0461
C_amorph-3	ARG	-16.6668	-16.9175	-16.4172
C_amorph-3	ASN	-8.58	-8.864	-8.2999
C_amorph-3	ASP	-4.0651	-4.3227	-3.812
C_amorph-3	CHL	-3.1384	-3.3221	-2.9575
C_amorph-3	CYM	-2.2357	-2.387	-2.0877
C_amorph-3	CYS	-5.2506	-5.4162	-5.0864
C_amorph-3	DGL	-19.0873	-19.4636	-18.7113
C_amorph-3	EST	-13.6872	-13.9848	-13.3916
C_amorph-3	ETA	-0.63	-0.6931	-0.5681
C_amorph-3	GAN	-12.8308	-13.2607	-12.4059
C_amorph-3	GLN	-11.5191	-11.7585	-11.281
C_amorph-3	GLU	-6.668	-6.7869	-6.5506
C_amorph-3	GLY	-9.8422	-9.9673	-9.7182
C_amorph-3	HID	-14.935	-15.1433	-14.728
C_amorph-3	HIE	-14.9676	-15.1154	-14.8204
C_amorph-3	HIP	-12.8077	-13.1485	-12.4678
C_amorph-3	ILE	-12.0661	-12.3199	-11.8133
C_amorph-3	LEU	-11.9725	-12.2402	-11.7063
C_amorph-3	LYS	-9.1709	-9.5526	-8.7937
C_amorph-3	MET	-12.4463	-12.7698	-12.1252
C_amorph-3	PHE	-16.7147	-17.1863	-16.2475
C_amorph-3	PHO	-8.1521	-8.3812	-7.9289
C_amorph-3	PRO	-18.5666	-18.8719	-18.2622
C_amorph-3	SER	-4.0161	-4.2455	-3.7918
C_amorph-3	THR	-6.998	-7.1066	-6.8903
C_amorph-3	TRP	-21.1777	-21.7175	-20.6394
C_amorph-3	TYR	-20.4053	-20.7854	-20.0268
C_amorph-3	VAL	-8.8855	-9.154	-8.6205

## Sheet: Comments
Authros:		Marzieh Saeedi Masine, Eric G. Brandt, Alexander P. Lyubartsev
Title:		An atomistic perspective on biomolecular adsorption on functionalized carbon nanomaterials at ambient conditions
Publications:		Submitted to the Journal of Physical Chemistry C as a part of Supporting Information
Material	Name of the material.
Adsorbate	Name of the adsorbate. See the main text and SI
DF	Average binding free energy kJ/mol)
DF_lower	Lower estimate of the binding free energy
DF_upper	Upper estimate of the binding free energy
